# Supplementary material for: Y©B8C4 cluster: a boron–carbon molecular wheel with dodeca-coordination number in plane
Source: Royal Society of Chemistry journal article supplement (doi:10.1039/d2cp04195b), 2022-01-01
Supplement: d2cp04195b1.pdf [file d2cp04195b1.pdf]

## SUPPLEMENTARY INFORMATION

### **Y $\odot$ B<sub>8</sub>C<sub>4</sub> Cluster: A Boron-Carbon Molecular Wheel with Dodeca-coordination Number in Plane**

Ying-Jin Wang,<sup>\*a</sup> Lin-Yan Feng,<sup>a</sup> Miao Yan,<sup>a</sup> Chang-Qing Miao,<sup>a</sup> and

Hua-Jin Zhai<sup>\*b</sup>

<sup>a</sup>*Department of Chemistry, Xinzhou Teachers University, Xinzhou 034000, Shanxi, China*

<sup>b</sup>*Nanocluster Laboratory, Institute of Molecular Science, Shanxi University, Taiyuan 030006, China*

<sup>\*</sup>E-mail: yingjinwang@sxu.edu.cn; hj.zhai@sxu.edu.cn

## Supplementary Information

**Table S1.** Cartesian coordinates for the  $D_{4h}$  ( $^2B_{1u}$ ) global-minimum (GM) structure of Y $\odot$ B<sub>8</sub>C<sub>4</sub> cluster at PBE0/B,C/6-311+G\*/Y/Stuttgart'97 level.

**Figure S1.** Alternative optimized Low-lying isomers of Y $\odot$ B<sub>8</sub>C<sub>4</sub> cluster. All energies are in eV. The relative energies are shown at the single-point CCSD(T)/Y/Stuttgart'97/B,C/6-311+G\*//PBE0/Y/Stuttgart'97/B,C/6-311+G\* level (for top ten), at PBE0/Y/Stuttgart'97/B,C/6-311+G\* level (in square brackets), and at B3LYP/Y/Stuttgart'97/B,C/6-311+G\* level (in curly brackets), respectively. The relative energies at both PBE0 and B3LYP levels are corrected with the zero-point energies (ZPEs).

- Figure S2.** The top five isomers of (a)  $Y\odot B_8C_4^+$  and (b)  $Y\odot B_8C_4^-$  clusters at PBE0/Y/Stuttgart'97/B,C/6-311+G\* level. The relative energies (in eV) are corrected with ZPEs.
- Figure S3.** Calculated bond distances (in Å) at PBE0/Y/Stuttgart'97/B,C/6-311+G\* level for (a)  $D_{4h}$  ( $^2B_{1u}$ ) GM  $Y\odot B_8C_4$  cluster, along with their (b) Wiberg bond indices (WBIs) and (c) natural atomic charges in  $|e|$  from the natural bond orbital (NBO) analyses at PBE0/Y/Stuttgart'97/B,C/6-311G\* level.
- Figure S4.** Occupied canonical molecular orbitals (CMOs) of the  $D_{4h}$  ( $^2B_{1u}$ ) GM  $Y\odot B_8C_4$  cluster. (a) Twelve  $\sigma$  CMOs for two-center two-electron (2c-2e) B–C/B–B Lewis  $\sigma$  bonds in  $B_8C_4$  ring. (b) Five delocalized  $\sigma$  CMOs in  $Y\odot B_8C_4$ . (c) Five delocalized  $\pi$  CMOs in  $Y\odot B_8C_4$ , the SOMO represents single occupation.
- Figure S5.** The CMOs energy diagram of delocalized  $\sigma/\pi$  frameworks in  $D_{4h}$  ( $^2B_{1u}$ ) GM  $Y\odot B_8C_4$  cluster.
- Figure S6.** The energy cycle of  $D_{4h}$  ( $^2B_{1u}$ ) GM  $Y\odot B_8C_4$  cluster, along with the isomerization energy of  $B_8C_4$  ring, bond dissociation energy (BDE) and inherent interaction energy between the central Y and  $B_8C_4$  ring (in kcal mol $^{-1}$ ).

**Figure S1.** Alternative optimized Low-lying isomers of  $Y@B_8C_4$  cluster. All energies are in eV. The relative energies are shown at the single-point CCSD(T)/Y/Stuttgart'97/B,C/6-311+G\*\*//PBE0/Y/Stuttgart'97/B,C/6-311+G\* level (for top ten), at PBE0/Y/Stuttgart'97/B,C/6-311+G\* level (in square brackets), and at B3LYP/Y/Stuttgart'97/B,C/6-311+G\* level (in curly brackets), respectively. The relative energies at both PBE0 and B3LYP levels are corrected with the zero-point energies (ZPEs).

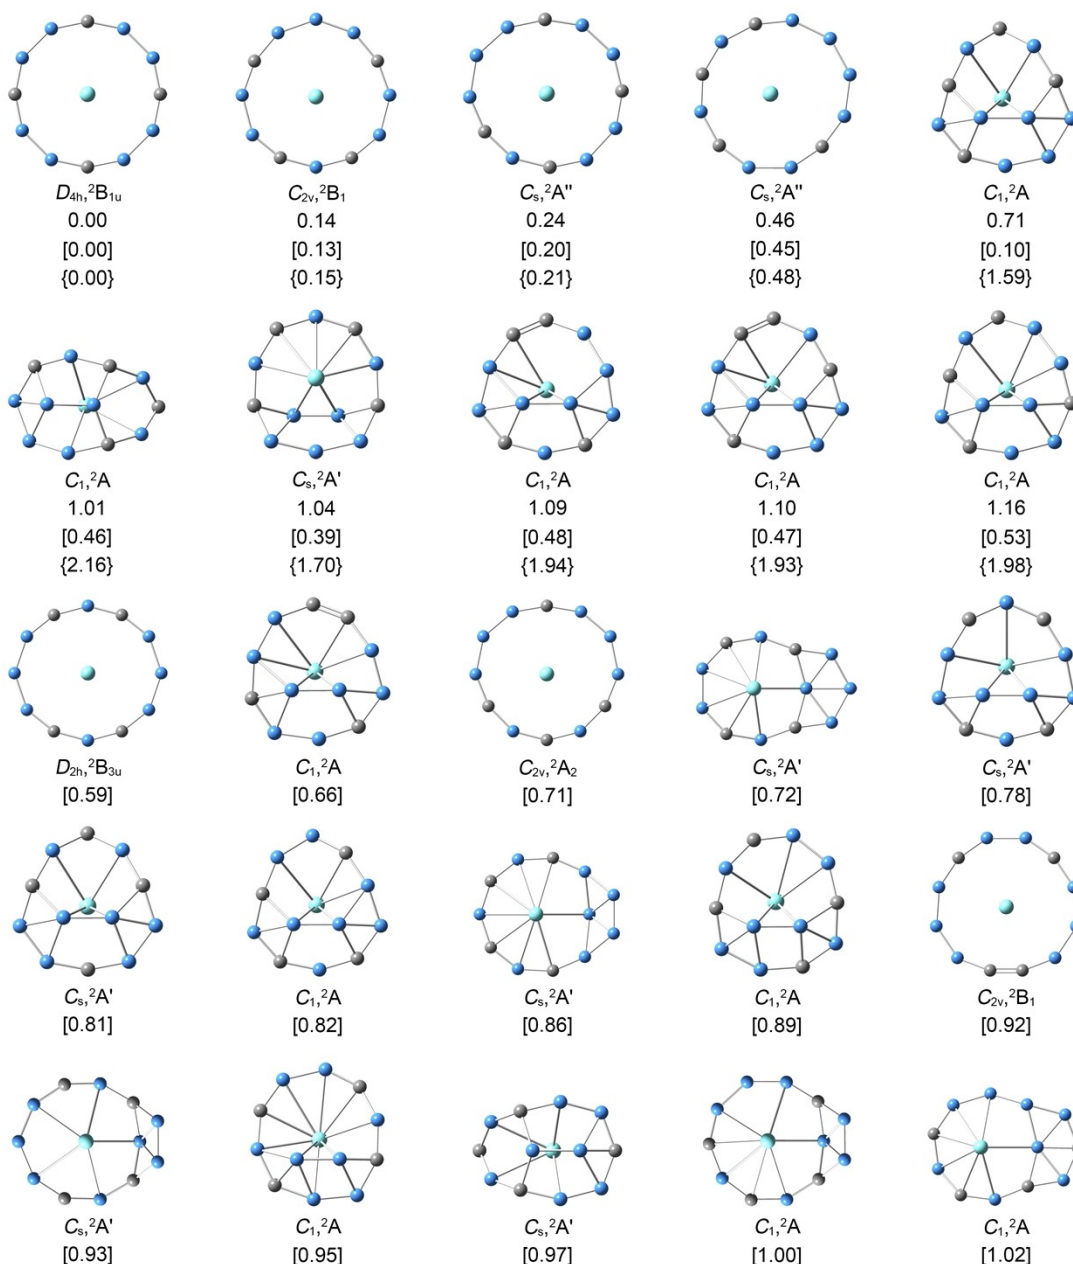

Continue .....

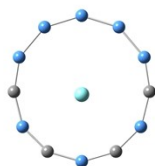

$C_{2v}, ^2B_1$   
[1.03]

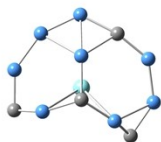

$C_1, ^2A$   
[1.07]

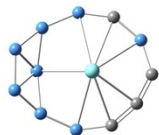

$C_1, ^2A$   
[1.08]

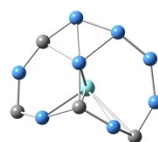

$C_1, ^2A$   
[1.15]

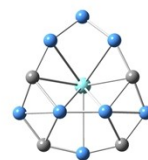

$C_s, ^2A'$   
[1.17]

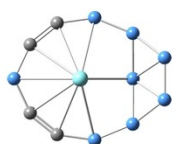

$C_s, ^2A'$   
[1.20]

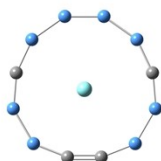

$C_{2v}, ^2A_2$   
[1.22]

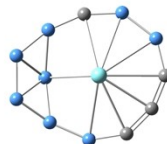

$C_1, ^2A$   
[1.23]

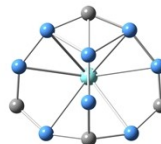

$C_s, ^2A'$   
[1.26]

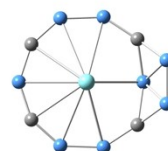

$C_s, ^2A'$   
[1.26]

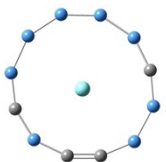

$C_s, ^2A''$   
[1.28]

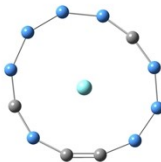

$C_s, ^2A''$   
[1.34]

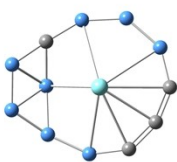

$C_1, ^2A$   
[1.38]

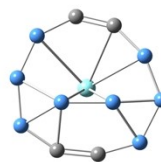

$C_1, ^2A$   
[1.38]

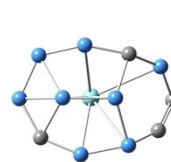

$C_1, ^2A$   
[1.41]

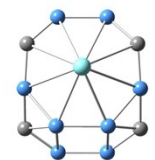

$C_s, ^2A'$   
[1.45]

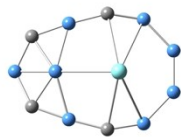

$C_s, ^2A'$   
[1.45]

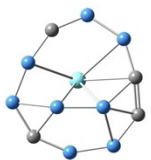

$C_1, ^2A$   
[1.46]

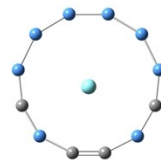

$C_{2v}, ^2A_2$   
[1.47]

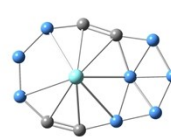

$C_1, ^2A$   
[1.51]

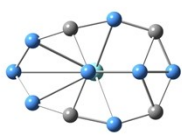

$C_s, ^2A'$   
[1.53]

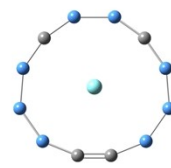

$C_{2v}, ^2A_2$   
[1.57]

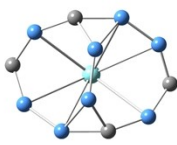

$C_2, ^2A$   
[1.61]

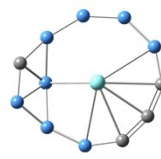

$C_1, ^2A$   
[1.62]

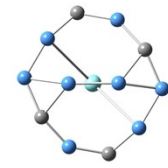

$C_2, ^2B$   
[1.64]

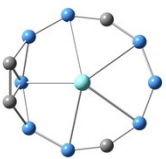

$C_s, ^2A'$   
[1.66]

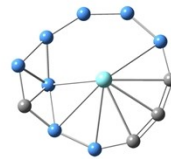

$C_1, ^2A$   
[1.70]

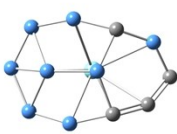

$C_1, ^2A$   
[1.77]

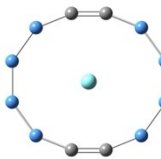

$D_{2h}, ^2A_u$   
[1.78]

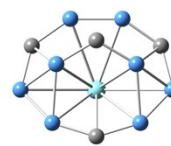

$C_s, ^2A'$   
[1.81]

Continue .....

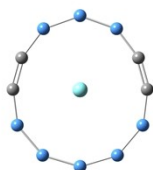

$C_{2v}, ^2A_2$   
[1.83]

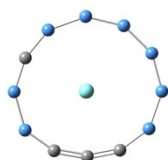

$C_s, ^2A''$   
[1.84]

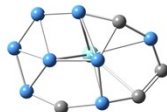

$C_1, ^2A$   
[1.85]

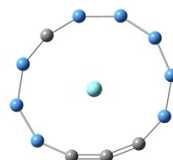

$C_s, ^2A''$   
[1.86]

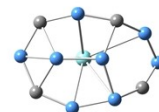

$C_1, ^2A$   
[1.88]

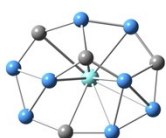

$C_1, ^2A$   
[1.90]

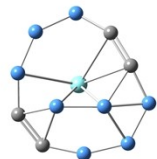

$C_1, ^2A$   
[1.94]

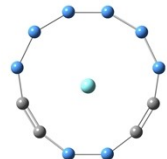

$C_{2v}, ^2A_2$   
[1.94]

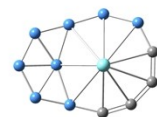

$C_1, ^2A$   
[1.96]

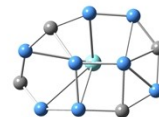

$C_1, ^2A$   
[1.96]

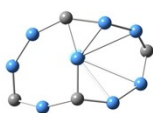

$C_1, ^2A$   
[1.96]

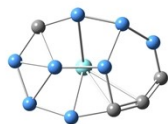

$C_1, ^2A$   
[1.99]

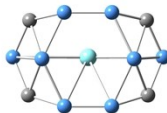

$C_s, ^2A'$   
[2.08]

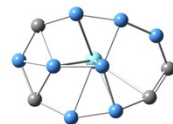

$C_1, ^2A$   
[2.10]

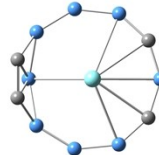

$C_s, ^2A'$   
[2.11]

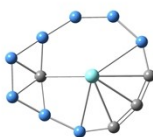

$C_1, ^2A$   
[2.12]

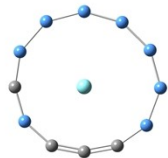

$C_s, ^2A''$   
[2.13]

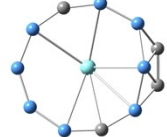

$C_1, ^2A$   
[2.21]

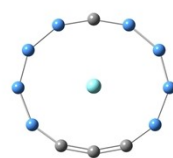

$C_{2v}, ^2B_1$   
[2.24]

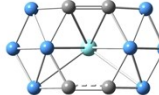

$C_s, ^2A'$   
[2.25]

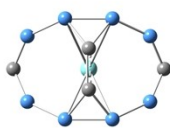

$C_{2v}, ^2A_2$   
[2.28]

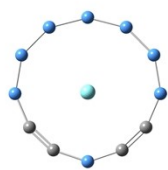

$C_{2v}, ^2B_1$   
[2.29]

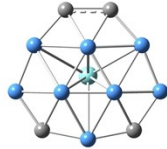

$C_s, ^2A'$   
[2.32]

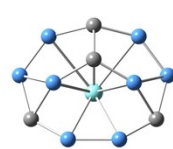

$C_s, ^2A'$   
[2.35]

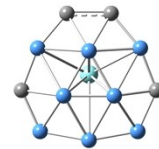

$C_s, ^2A'$   
[2.36]

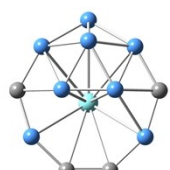

$C_s, ^2A'$   
[2.45]

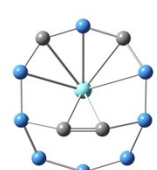

$C_s, ^2A'$   
[2.49]

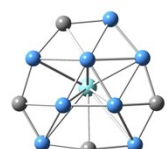

$C_1, ^2A$   
[2.52]

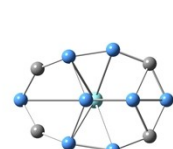

$C_s, ^2A'$   
[2.64]

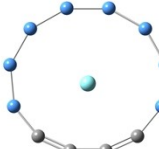

$C_{2v}, ^2B_1$   
[3.23]

**Figure S2.** The top five isomers of  $Y\text{C}_8\text{B}_8\text{C}_4^+$  (a) and  $Y\text{C}_8\text{B}_8\text{C}_4^-$  (b) clusters at PBE0/Y/Stuttgart'97/B,C/6-311+G\* level. The relative energies (in eV) are corrected with ZPEs.

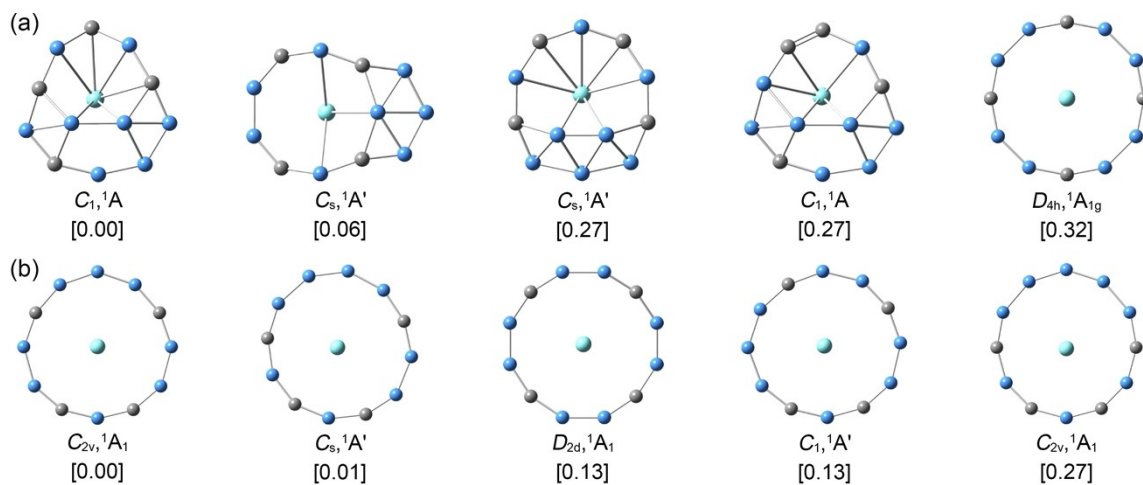

**Figure S3.** Calculated bond distances (in Å) at PBE0/Y/Stuttgart'97/B,C/6-311+G\* level for (a)  $D_{4h}$  ( $^2B_{1u}$ ) GM  $Y@B_8C_4$  cluster, along with their (b) Wiberg bond indices (WBIs) and (c) natural atomic charges in  $|e|$  from the natural bond orbital (NBO) analyses at PBE0/Y/Stuttgart'97/B,C/6-311G\* level.

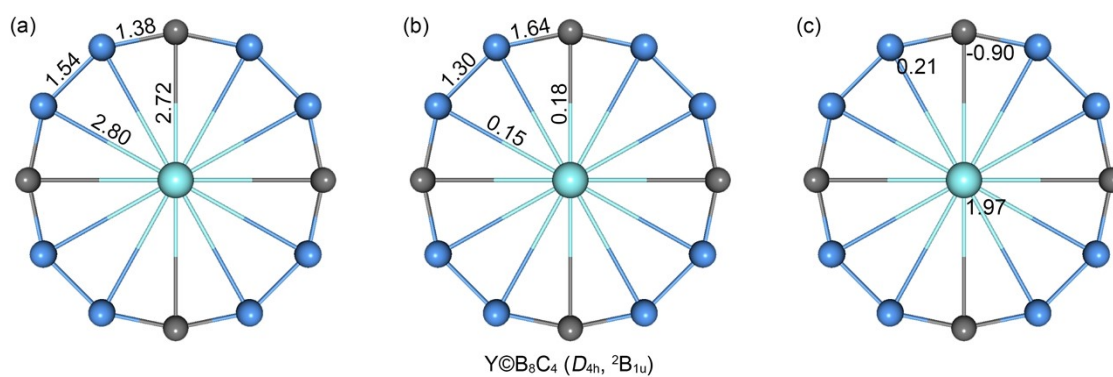

**Figure S4.** Occupied canonical molecular orbitals (CMOs) of the  $D_{4h}$  ( $^2B_{1u}$ ) GM  $Y\odot B_8C_4$  cluster. (a) Twelve  $\sigma$  CMOs for two-center two-electron (2c-2e) B–C/B–B Lewis  $\sigma$  bonds in  $B_8C_4$  ring. (b) Five delocalized  $\sigma$  CMOs in  $Y\odot B_8C_4$ . (c) Five delocalized  $\pi$  CMOs in  $Y\odot B_8C_4$ , the SOMO represents single occupation.

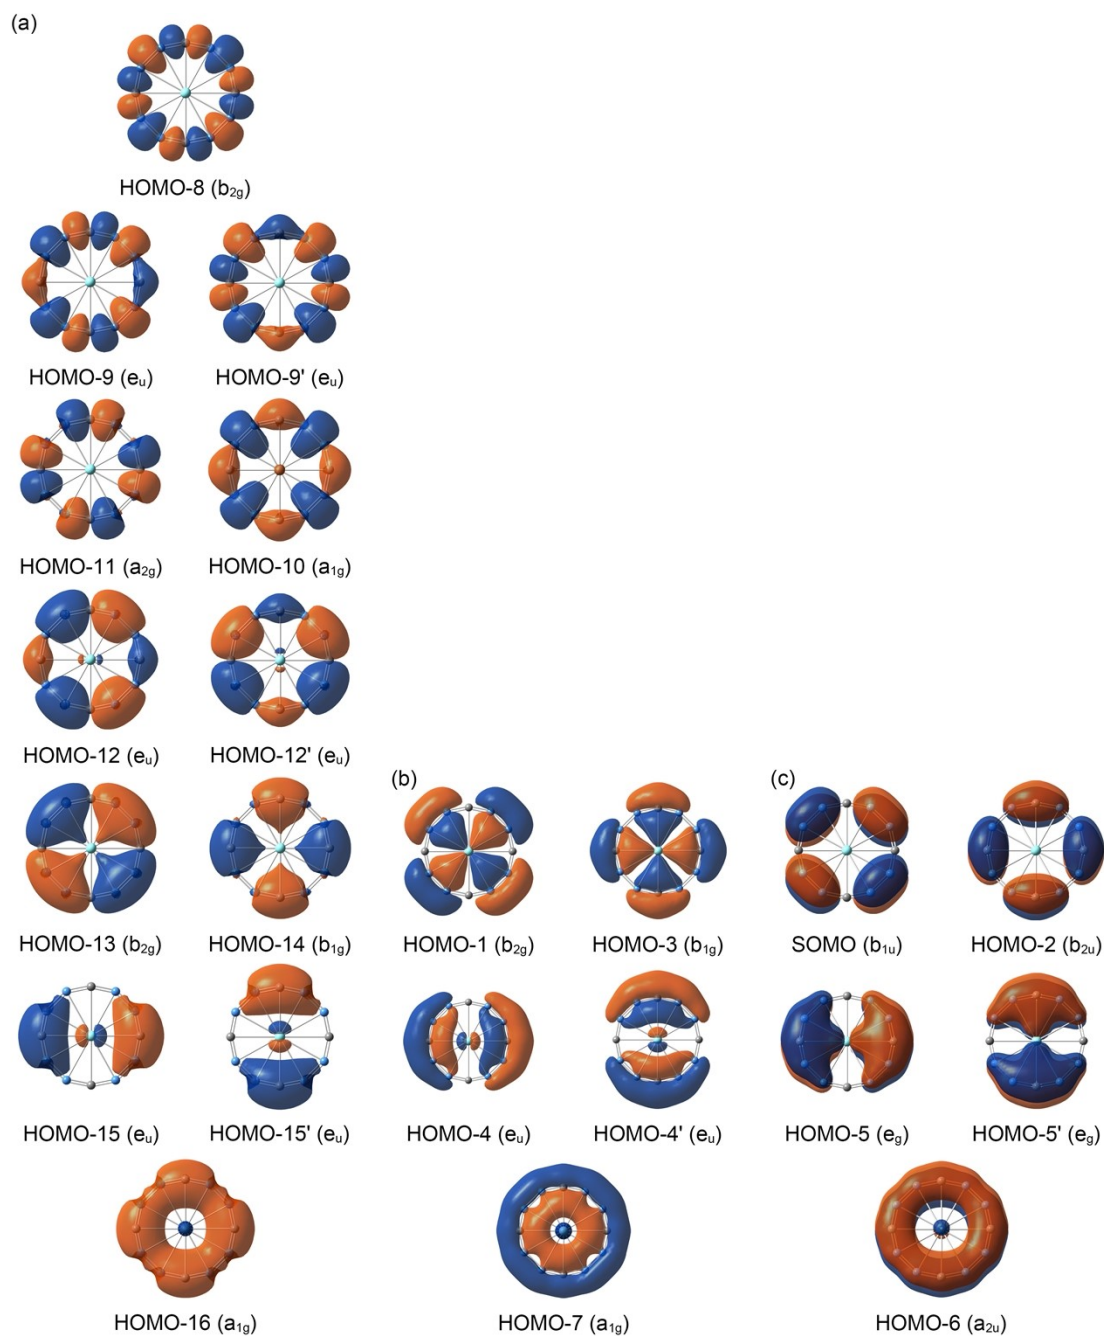

**Figure S5.** The CMOs energy diagram of delocalized  $\sigma/\pi$  frameworks in  $D_{4h}$  ( $^2B_{1u}$ ) GM  $Y\text{C}_8\text{B}_4$  cluster.

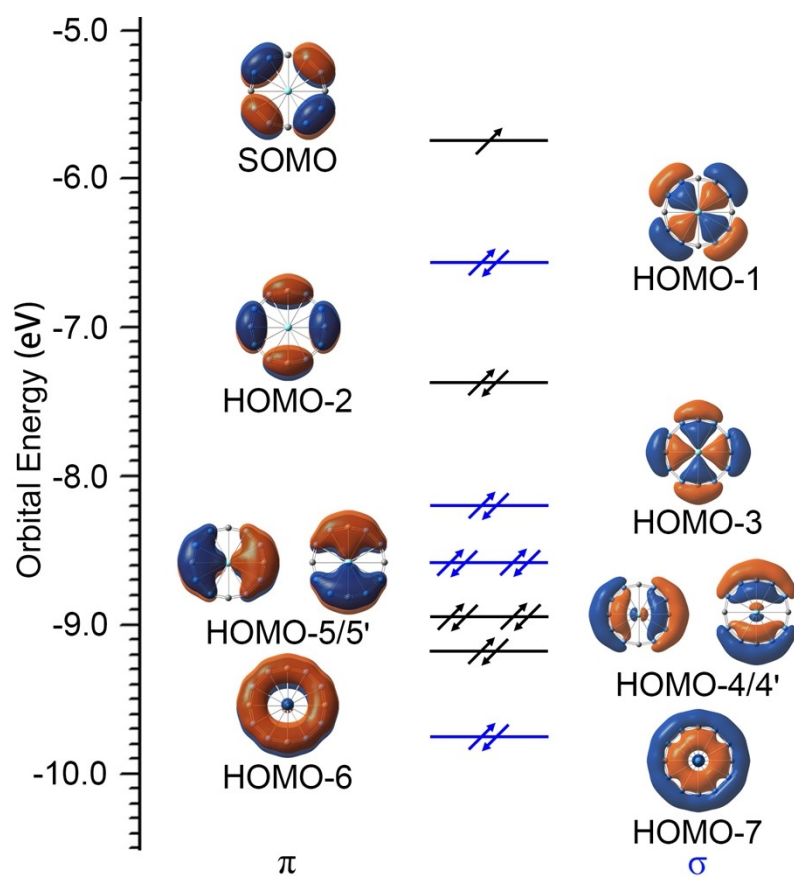

**Figure S6.** The energy cycle of  $D_{4h}$  ( $^2B_{1u}$ ) GM  $Y\text{C}_8\text{B}_4$  cluster, along with the isomerization energy of  $B_8C_4$  ring, bond dissociation energy (BDE) and inherent interaction energy between the central Y and  $B_8C_4$  ring (in kcal mol $^{-1}$ ).

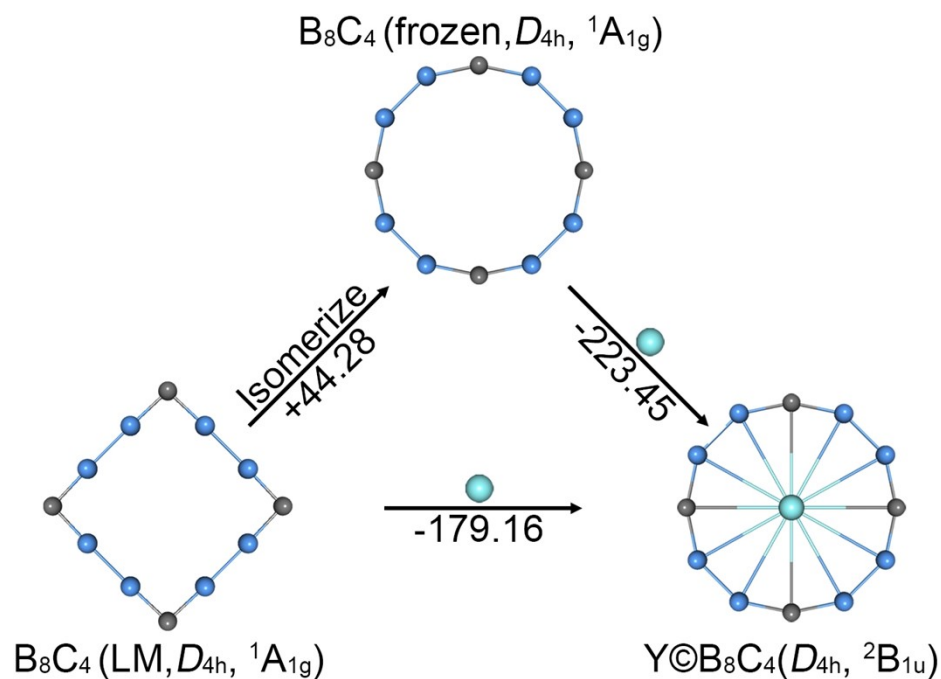

**Table S1.** Cartesian coordinates for the  $D_{4h}$  ( $^2B_{1u}$ ) global-minimum (GM) structure of  $Y\text{C}_8\text{B}_8\text{C}_4$  cluster at PBE0/B,C/6-311+G\*/Y/Stuttgart'97 level.

**$Y\text{C}_8\text{B}_8\text{C}_4$  GM ( $D_{4h}$ ,  $^2B_{1u}$ )**

|   |             |             |            |
|---|-------------|-------------|------------|
| C | 0.00000000  | 2.71839600  | 0.00000000 |
| C | 0.00000000  | -2.71839600 | 0.00000000 |
| C | 2.71839600  | 0.00000000  | 0.00000000 |
| C | -2.71839600 | 0.00000000  | 0.00000000 |
| B | 2.44549100  | 1.35592000  | 0.00000000 |
| B | 1.35592000  | 2.44549100  | 0.00000000 |
| B | -1.35592000 | 2.44549100  | 0.00000000 |
| B | -2.44549100 | 1.35592000  | 0.00000000 |
| B | -2.44549100 | -1.35592000 | 0.00000000 |
| B | -1.35592000 | -2.44549100 | 0.00000000 |
| B | 1.35592000  | -2.44549100 | 0.00000000 |
| B | 2.44549100  | -1.35592000 | 0.00000000 |
| Y | 0.00000000  | 0.00000000  | 0.00000000 |
